# Supplementary material for: Achieving remission or low disease activity is associated with better outcomes in patients with systemic lupus erythematosus: a systematic literature review
Source: PubMed Central journal article supplement — Lupus Sci Med. 2021 Sep 21;8(1):e000542. doi: 10.1136/lupus-2021-000542 (PMC8458331; doi:10.1136/lupus-2021-000542), 2021-09-21
Supplement: lupus-2021-000542supp001.pdf [file lupus-2021-000542supp001.pdf]

## Supplementary Table 1 Search strategy example

The following Medical Subject Heading (MeSH) terms and Title/Abstracts search were implemented in PubMed database:

- ☐ "Lupus Erythematosus, Systemic"
- ☐ "Lupus"
- ☐ "SLE"
- ☐ "Remission"
- ☐ "Low disease activity status"
- ☐ "lupus low disease activity status"
- ☐ "minimal disease activity"

We applied the following Boolean operators to develop the search: "AND" and "OR" retrieving different MeSH Heading/Subheading Combination

The following combinations and the corresponding number of studies were retrieved:

- ((systemic lupus erythematosus[MeSH Terms]) OR SLE[Title/Abstract] OR lupus[MeSH Terms]) OR systemic lupus erythematosus[Title/Abstract]= 107331
- ((remission[Title/Abstract]) OR low disease activity status[Title/Abstract]) OR minimal disease activity[Title/Abstract] OR lupus low disease activity state[Title/Abstract] = 155254
- (((systemic lupus erythematosus[MeSH Terms]) OR lupus[MeSH Terms]) OR systemic lupus erythematosus[Title/Abstract])) AND (((remission[Title/Abstract]) OR minimal disease activity[Title/Abstract]) OR low disease activity status[Title/Abstract]) OR lupus low disease activity state[Title/Abstract]= 3428
