# Supplementary material for: Achieving remission or low disease activity is associated with better outcomes in patients with systemic lupus erythematosus: a systematic literature review
Source: PubMed Central journal article supplement — Lupus Sci Med. 2021 Sep 21;8(1):e000542. doi: 10.1136/lupus-2021-000542 (PMC8458331; doi:10.1136/lupus-2021-000542), 2021-09-21
Supplement: lupus-2021-000542supp002.pdf [file lupus-2021-000542supp002.pdf]

Supplementary Table 2: Prevalence of remission and LDA in the several cohorts as a function of the different definitions.\*

| Authors         | Country/Region | Year of publication | Patients | Ethnicity |                   |                  |                    |        | Cross-sectional or longitudinal | Follow-up years | Remission                                                    |                        |      |                       |                            |                  | % on remission   |      |
|-----------------|----------------|---------------------|----------|-----------|-------------------|------------------|--------------------|--------|---------------------------------|-----------------|--------------------------------------------------------------|------------------------|------|-----------------------|----------------------------|------------------|------------------|------|
|                 |                |                     |          | Caucasian | Asian             | Mestizo/Hispanic | African descendant | Others |                                 |                 | Disease activity index                                       | Immunological activity | PGA  | Prednisone daily dose | Immunosuppressive drug use | Antimalarial use | Minimal duration |      |
| Drenkard        | Mexico         | 1996                | 667      | NR        | NR                | NR               | NR                 | NR     | Longitudinal                    | 11.6            | Lack of clinical disease activity (no formal index was used) | Allowed                | NR   | Not allowed           | Not allowed                | Not allowed      | 1 year           | 23.4 |
| Medina-Quiñones | UK             | 2016                | 532      | 55.3      | 4.1+13.9 (Indian) | NR               | 10.9               | 6.8    | Longitudinal                    | 12              | BILAG C, D, E                                                | Allowed                | NR   | 0                     | Not allowed                | Allowed          | 3 years          | 22.9 |
| Medina-Quiñones | UK             | 2016                | 532      | 55.3      | 4.1+13.9 (Indian) | NR               | 10.9               | 6.8    | Longitudinal                    | 12              | BILAG C, D, E                                                | Not allowed            | NR   | 0                     | Not allowed                | Allowed          | 3 years          | 14.5 |
| Polachek        | Canada         | 2017                | 620      | NR        | NR                | NR               | NR                 | NR     | Longitudinal                    | 4               | SLEDAI=0                                                     | Not allowed            | NR   | Not allowed           | Not allowed                | Allowed          | 1 year           | 30.8 |
| Zen             | Italy          | 2017                | 293      | 100       | 0                 | 0                | 0                  | 0      | Longitudinal                    | 7               | Clinical SLEDAI=0                                            | Allowed                | NR   | ≤5                    | Allowed                    | Allowed          | 1 year           | 88.1 |
| Zen             | Italy          | 2017                | 293      | 100       | 0                 | 0                | 0                  | 0      | Longitudinal                    | 7               | Clinical SLEDAI=0                                            | Allowed                | NR   | ≤5                    | Allowed                    | Allowed          | 2 year           | 78.8 |
| Zen             | Italy          | 2017                | 293      | 100       | 0                 | 0                | 0                  | 0      | Longitudinal                    | 7               | Clinical SLEDAI=0                                            | Allowed                | NR   | ≤5                    | Allowed                    | Allowed          | 3 year           | 62.8 |
| Zen             | Italy          | 2017                | 293      | 100       | 0                 | 0                | 0                  | 0      | Longitudinal                    | 7               | Clinical SLEDAI=0                                            | Allowed                | NR   | ≤5                    | Allowed                    | Allowed          | 4 year           | 47.4 |
| Zen             | Italy          | 2017                | 293      | 100       | 0                 | 0                | 0                  | 0      | Longitudinal                    | 7               | Clinical SLEDAI=0                                            | Allowed                | NR   | ≤5                    | Allowed                    | Allowed          | 5 year           | 38.6 |
| Ugarte-Gil      | Latin America  | 2017                | 1350     | 41.8      | NR                | 42.7             | 11.7               | 3.8    | Longitudinal                    | 2.4             | SLEDAI=0                                                     | Not allowed            | NR   | ≤5                    | Allowed                    | Allowed          | at least once    | 20.2 |
| Tsang-A-Sjoe    | Netherlands    | 2017                | 183      | 68.3      | NR                | NR               | NR                 | 31.7   | Longitudinal                    | 5               | Clinical SLEDAI=0                                            | Allowed                | NR   | ≤5                    | Allowed                    | Allowed          | 1 year           | 54.6 |
| Tsang-A-Sjoe    | Netherlands    | 2017                | 183      | 68.3      | NR                | NR               | NR                 | 31.7   | Longitudinal                    | 5               | Clinical SLEDAI=0                                            | Allowed                | NR   | ≤5                    | Allowed                    | Allowed          | 2 years          | 43.8 |
| Tsang-A-Sjoe    | Netherlands    | 2017                | 183      | 68.3      | NR                | NR               | NR                 | 31.7   | Longitudinal                    | 5               | Clinical SLEDAI=0                                            | Allowed                | NR   | ≤5                    | Allowed                    | Allowed          | 3 years          | 39.6 |
| Tsang-A-Sjoe    | Netherlands    | 2017                | 183      | 68.3      | NR                | NR               | NR                 | 31.7   | Longitudinal                    | 5               | Clinical SLEDAI=0                                            | Allowed                | NR   | ≤5                    | Allowed                    | Allowed          | 4 years          | 33.0 |
| Tsang-A-Sjoe    | Netherlands    | 2017                | 183      | 68.3      | NR                | NR               | NR                 | 31.7   | Longitudinal                    | 5               | Clinical SLEDAI=0                                            | Allowed                | NR   | ≤5                    | Allowed                    | Allowed          | 5 years          | 32.5 |
| Mok             | Hong Kong      | 2017                | 769      | 0         | 100               | 0                | 0                  | 0      | Longitudinal                    | ≥5              | Clinical SLEDAI=0                                            | Allowed                | <0.5 | ≤5                    | Allowed                    | Allowed          | 1 year           | 60.1 |
| Mok             | Hong Kong      | 2017                | 769      | 0         | 100               | 0                | 0                  | 0      | Longitudinal                    | ≥5              | Clinical SLEDAI=0                                            | Allowed                | <0.5 | ≤5                    | Allowed                    | Allowed          | 3 years          | 43.0 |
| Mok             | Hong Kong      | 2017                | 769      | 0         | 100               | 0                | 0                  | 0      | Longitudinal                    | ≥5              | Clinical SLEDAI=0                                            | Allowed                | <0.5 | ≤5                    | Allowed                    | Allowed          | 5 years          | 31.5 |
| Mok             | Hong Kong      | 2017                | 769      | 0         | 100               | 0                | 0                  | 0      | Longitudinal                    | ≥5              | Clinical SLEDAI=0                                            | Allowed                | <0.5 | ≤5                    | Allowed                    | Allowed          | 7 years          | 24.9 |
| Mok             | Hong Kong      | 2017                | 769      | 0         | 100               | 0                | 0                  | 0      | Longitudinal                    | ≥5              | Clinical SLEDAI=0                                            | Allowed                | <0.5 | 0                     | Not allowed                | Allowed          | 1 year           | 18.6 |
| Mok             | Hong Kong      | 2017                | 769      | 0         | 100               | 0                | 0                  | 0      | Longitudinal                    | ≥5              | Clinical SLEDAI=0                                            | Allowed                | <0.5 | 0                     | Not allowed                | Allowed          | 3 years          | 16.8 |
| Mok             | Hong Kong      | 2017                | 769      | 0         | 100               | 0                | 0                  | 0      | Longitudinal                    | ≥5              | Clinical SLEDAI=0                                            | Allowed                | <0.5 | 0                     | Not allowed                | Allowed          | 5 years          | 14.4 |
| Mok             | Hong Kong      | 2017                | 769      | 0         | 100               | 0                | 0                  | 0      | Longitudinal                    | ≥5              | Clinical SLEDAI=0                                            | Allowed                | <0.5 | 0                     | Not allowed                | Allowed          | 7 years          | 13.9 |
| Mok             | Hong Kong      | 2017                | 769      | 0         | 100               | 0                | 0                  | 0      | Longitudinal                    | ≥5              | Clinical SLEDAI=0                                            | Not allowed            | <0.5 | ≤5                    | Allowed                    | Allowed          | 1 year           | 33.2 |
| Mok             | Hong Kong      | 2017                | 769      | 0         | 100               | 0                | 0                  | 0      | Longitudinal                    | ≥5              | Clinical SLEDAI=0                                            | Not allowed            | <0.5 | ≤5                    | Allowed                    | Allowed          | 3 years          | 26.2 |
| Mok             | Hong Kong      | 2017                | 769      | 0         | 100               | 0                | 0                  | 0      | Longitudinal                    | ≥5              | Clinical SLEDAI=0                                            | Not allowed            | <0.5 | ≤5                    | Allowed                    | Allowed          | 5 years          | 21.0 |
| Mok             | Hong Kong      | 2017                | 769      | 0         | 100               | 0                | 0                  | 0      | Longitudinal                    | ≥5              | Clinical SLEDAI=0                                            | Not allowed            | <0.5 | ≤5                    | Allowed                    | Allowed          | 7 years          | 17.4 |
| Mok             | Hong Kong      | 2017                | 769      | 0         | 100               | 0                | 0                  | 0      | Longitudinal                    | ≥5              | Clinical SLEDAI=0                                            | Not allowed            | <0.5 | 0                     | Not allowed                | Allowed          | 1 year           | 13.3 |

|                    |              |      |      |       |      |    |    |       |                 |     |                   |             |       |             |             |         |                       |                      |  |
|--------------------|--------------|------|------|-------|------|----|----|-------|-----------------|-----|-------------------|-------------|-------|-------------|-------------|---------|-----------------------|----------------------|--|
| Mok                | Hong Kong    | 2017 | 769  | 0     | 100  | 0  | 0  | 0     | Longitudinal    | ≥5  | Clinical SLEDAI=0 | Not allowed | <0.5  | 0           | Not allowed | Allowed | 3 years               | 12.4                 |  |
| Mok                | Hong Kong    | 2017 | 769  | 0     | 100  | 0  | 0  | 0     | Longitudinal    | ≥5  | Clinical SLEDAI=0 | Not allowed | <0.5  | 0           | Not allowed | Allowed | 5 years               | 10.9                 |  |
| Mok                | Hong Kong    | 2017 | 769  | 0     | 100  | 0  | 0  | 0     | Longitudinal    | ≥5  | Clinical SLEDAI=0 | Not allowed | <0.5  | 0           | Not allowed | Allowed | 7 years               | 10.4                 |  |
| Petri              | US           | 2018 | 1356 | 55    | NR   | NR | 38 | 7     | Longitudinal    | 3.8 | Clinical SLEDAI=0 | Allowed     | <0.5  | ≤5          | Allowed     | Allowed | NR                    | NR                   |  |
| Petri              | US           | 2018 | 1356 | 55    | NR   | NR | 38 | 7     | Longitudinal    | 3.8 | Clinical SLEDAI=0 | Allowed     | <0.5  | 0           | Allowed     | Allowed | NR                    | NR                   |  |
| Tani               | Italy        | 2018 | 115  | NR    | NR   | NR | NR | NR    | Longitudinal    | ≥5  | Clinical SLEDAI=0 | Allowed     | <0.5  | ≤5          | Allowed     | Allowed | 100% of the follow-up | 21.7                 |  |
| Poomsalood         | Thailand     | 2018 | 237  | NR    | NR   | NR | NR | NR    | cross-sectional | NR  | Clinical SLEDAI=0 | Allowed     | NR    | ≤5          | Allowed     | Allowed | 1 year                | 42.2                 |  |
| Alarcon            | US           | 2019 | 558  | 28    | 0    | 35 | 37 | 0     | Longitudinal    | NR  | SLAM=0            | NR          | NR    | 5           | Not allowed | Allowed | NR                    | NR                   |  |
| Mathian A          | France       | 2019 | 407  | NR    | NR   | NR | NR | NR    | Longitudinal    | 1   | SLEDAI=0          | Not allowed | NR    | 0           | Allowed     | Allowed | NR                    | 21.1                 |  |
| Mathian A          | France       | 2019 | 407  | NR    | NR   | NR | NR | NR    | Longitudinal    | 1   | SLEDAI=0          | Not allowed | NR    | ≤5          | Not allowed | Allowed | NR                    | 35.6                 |  |
| Mathian A          | France       | 2019 | 407  | NR    | NR   | NR | NR | NR    | Longitudinal    | 1   | Clinical SLEDAI=0 | Allowed     | NR    | 0           | Allowed     | Allowed | NR                    | 32.6                 |  |
| Mathian A          | France       | 2019 | 407  | NR    | NR   | NR | NR | NR    | Longitudinal    | 1   | Clinical SLEDAI=0 | Allowed     | NR    | ≤5          | Not allowed | Allowed | NR                    | 62.4                 |  |
| Golder             | Asia Pacific | 2019 | 1707 | 10.1  | 87.7 | 0  | 0  | 2.2   | longitudinal    | 2.2 | Clinical SLEDAI=0 | Allowed     | <0.5  | 0           | Allowed     | Allowed | NR                    | 24.8                 |  |
| Golder             | Asia Pacific | 2019 | 1707 | 10.1  | 87.7 | 0  | 0  | 2.2   | longitudinal    | 2.2 | Clinical SLEDAI=0 | Allowed     | <0.5  | 0           | Not allowed | Allowed | NR                    | 18.4                 |  |
| Golder             | Asia Pacific | 2019 | 1707 | 10.1  | 87.7 | 0  | 0  | 2.2   | longitudinal    | 2.2 | Clinical SLEDAI=0 | Allowed     | <0.5  | ≤5          | Allowed     | Allowed | NR                    | 60.9                 |  |
| Golder             | Asia Pacific | 2019 | 1707 | 10.1  | 87.7 | 0  | 0  | 2.2   | longitudinal    | 2.2 | Clinical SLEDAI=0 | Allowed     | <0.5  | ≤5          | Not allowed | Allowed | NR                    | 38.2                 |  |
| Golder             | Asia Pacific | 2019 | 1707 | 10.1  | 87.7 | 0  | 0  | 2.2   | longitudinal    | 2.2 | Clinical SLEDAI=0 | Not allowed | <0.5  | 0           | Allowed     | Allowed | NR                    | 14.4                 |  |
| Golder             | Asia Pacific | 2019 | 1707 | 10.1  | 87.7 | 0  | 0  | 2.2   | longitudinal    | 2.2 | Clinical SLEDAI=0 | Not allowed | <0.5  | 0           | Not allowed | Allowed | NR                    | 11.1                 |  |
| Golder             | Asia Pacific | 2019 | 1707 | 10.1  | 87.7 | 0  | 0  | 2.2   | longitudinal    | 2.2 | Clinical SLEDAI=0 | Not allowed | <0.5  | ≤5          | Allowed     | Allowed | NR                    | 34.4                 |  |
| Golder             | Asia Pacific | 2019 | 1707 | 10.1  | 87.7 | 0  | 0  | 2.2   | longitudinal    | 2.2 | Clinical SLEDAI=0 | Not allowed | <0.5  | ≤5          | Not allowed | Allowed | NR                    | 21.4                 |  |
| Ugarte-Gil         | US           | 2019 | 483  | NR    | NR   | NR | NR | 0     | Longitudinal    | NR  | SLAM=0            | NR          | NR    | 5           | Not allowed | Allowed | NR                    | NR                   |  |
| Reatetgui-Sokolova | Peru         | 2019 | 315  | NR    | NR   | NR | NR | NR    | longitudinal    | NR  | SLEDAI=0          | Not allowed | NR    | ≤5          | Allowed     | Allowed | NR                    | 11.7 at baseline     |  |
| Margiotta          | Italy        | 2019 | 136  | NR    | NR   | NR | NR | NR    | cross-sectional | NR  | Clinical SLEDAI=0 | Allowed     | NR    | ≤5          | Allowed     | Allowed | NR                    | 82 at least one year |  |
| Fasano             | Italy        | 2019 | 294  | NR    | NR   | NR | NR | NR    | Longitudinal    | 9   | Clinical SLEDAI=0 | Allowed     | NR    | ≤5          | Allowed     | Allowed | 5                     | 44.5                 |  |
| Goswani            | India        | 2019 | 126  | NR    | NR   | NR | NR | NR    | Longitudinal    | 0.5 | Clinical SLEDAI=0 | Allowed     | <0.5  | Allowed     | allowed     | Allowed | NR                    | NR                   |  |
| Goswani            | India        | 2019 | 126  | NR    | NR   | NR | NR | NR    | Longitudinal    | 0.5 | Clinical SLEDAI=0 | Not allowed | <0.5  | Allowed     | allowed     | Allowed | NR                    | NR                   |  |
| Tsang-A-Sjoe       | Netherlands  | 2019 | 154  | 69.5% | NR   | NR | NR | 30.5% | Longitudinal    | 2   | Clinical SLEDAI=0 | Allowed     | ≤2/10 | ≤5          | Allowed     | Allowed | NR                    | At baseline 39.0     |  |
| Tsang-A-Sjoe       | Netherlands  | 2019 | 154  | 69.5% | NR   | NR | NR | 30.5% | Longitudinal    | 2   | Clinical SLEDAI=0 | Allowed     | ≤2/10 | not allowed | not allowed | Allowed | NR                    | At baseline 24.0     |  |
| Floris             | Italy        | 2020 | 116  | 100%  | 0    | 0  | 0  | 0     | Longitudinal    | 1.5 | Clinical SLEDAI=0 | allowed     | <0.5  | Allowed     | allowed     | Allowed | NR                    | 21.6 at 6 months     |  |
| Floris             | Italy        | 2020 | 116  | 100%  | 0    | 0  | 0  | 0     | Longitudinal    | 1.5 | Clinical SLEDAI=0 | allowed     | <0.5  | Allowed     | allowed     | Allowed | NR                    | 31.9 at 18 months    |  |
| Ugarte-Gil         | Peru         | 2020 | 208  | NR    | NR   | NR | NR | NR    | longitudinal    | 2.2 | SLEDAI=0          | Not allowed | NR    | ≤5          | Allowed     | Allowed | NR                    | NR                   |  |
| Saccon             | Italy        | 2020 | 646  | NR    | NR   | NR | NR | NR    | Longitudinal    | 5   | Any               | Allowed     | Any   | ≤5          | Allowed     | Allowed | 1 year                | 88.7                 |  |
| Saccon             | Italy        | 2020 | 646  | NR    | NR   | NR | NR | NR    | Longitudinal    | 5   | Any               | Allowed     | Any   | ≤5          | Allowed     | Allowed | 2 years               | 79.3                 |  |
| Saccon             | Italy        | 2020 | 646  | NR    | NR   | NR | NR | NR    | Longitudinal    | 5   | Any               | Allowed     | Any   | ≤5          | Allowed     | Allowed | 3 years               | 65.8                 |  |
| Saccon             | Italy        | 2020 | 646  | NR    | NR   | NR | NR | NR    | Longitudinal    | 5   | Any               | Allowed     | Any   | ≤5          | Allowed     | Allowed | 4 years               | 53.4                 |  |
| Saccon             | Italy        | 2020 | 646  | NR    | NR   | NR | NR | NR    | Longitudinal    | 5   | Any               | Allowed     | Any   | ≤5          | Allowed     | Allowed | 5 years               | 34.4                 |  |
| Saccon             | Italy        | 2020 | 646  | NR    | NR   | NR | NR | NR    | Longitudinal    | 5   | Any               | Allowed     | <0.5  | Allowed     | Allowed     | Allowed | 1 year                | 74.6                 |  |
| Saccon             | Italy        | 2020 | 646  | NR    | NR   | NR | NR | NR    | Longitudinal    | 5   | Any               | Allowed     | <0.5  | Allowed     | Allowed     | Allowed | 2 years               | 58.4                 |  |

|              |                |                     |                   |           |       |                  |                    |        |                                 |                 |                        |                           |                       |         |                       |                            |                  |                       |          |
|--------------|----------------|---------------------|-------------------|-----------|-------|------------------|--------------------|--------|---------------------------------|-----------------|------------------------|---------------------------|-----------------------|---------|-----------------------|----------------------------|------------------|-----------------------|----------|
| Saccon       | Italy          | 2020                | 646               | NR        | NR    | NR               | NR                 | NR     | Longitudinal                    | 5               | Any                    | Allowed                   | <0.5                  | Allowed | Allowed               | Allowed                    | 3 years          | 40.9                  |          |
| Saccon       | Italy          | 2020                | 646               | NR        | NR    | NR               | NR                 | NR     | Longitudinal                    | 5               | Any                    | Allowed                   | <0.5                  | Allowed | Allowed               | Allowed                    | 4 years          | 26.8                  |          |
| Saccon       | Italy          | 2020                | 646               | NR        | NR    | NR               | NR                 | NR     | Longitudinal                    | 5               | Any                    | Allowed                   | <0.5                  | Allowed | Allowed               | Allowed                    | 5 years          | 13.0                  |          |
| Saccon       | Italy          | 2020                | 646               | NR        | NR    | NR               | NR                 | NR     | Longitudinal                    | 5               | CSLEAI=0               | Allowed                   | Any                   | Allowed | Allowed               | Allowed                    | 1 year           | 84.8                  |          |
| Saccon       | Italy          | 2020                | 646               | NR        | NR    | NR               | NR                 | NR     | Longitudinal                    | 5               | CSLEAI=0               | Allowed                   | Any                   | Allowed | Allowed               | Allowed                    | 2 years          | 70.6                  |          |
| Saccon       | Italy          | 2020                | 646               | NR        | NR    | NR               | NR                 | NR     | Longitudinal                    | 5               | CSLEAI=0               | Allowed                   | Any                   | Allowed | Allowed               | Allowed                    | 3 years          | 50.6                  |          |
| Saccon       | Italy          | 2020                | 646               | NR        | NR    | NR               | NR                 | NR     | Longitudinal                    | 5               | CSLEAI=0               | Allowed                   | Any                   | Allowed | Allowed               | Allowed                    | 4 years          | 38.7                  |          |
| Saccon       | Italy          | 2020                | 646               | NR        | NR    | NR               | NR                 | NR     | Longitudinal                    | 5               | CSLEAI=0               | Allowed                   | Any                   | Allowed | Allowed               | Allowed                    | 5 years          | 18.4                  |          |
| Saccon       | Italy          | 2020                | 646               | NR        | NR    | NR               | NR                 | NR     | Longitudinal                    | 5               | Any                    | Allowed                   | <0.5                  | <=5     | Allowed               | Allowed                    | 1 year           | 70.0                  |          |
| Saccon       | Italy          | 2020                | 646               | NR        | NR    | NR               | NR                 | NR     | Longitudinal                    | 5               | Any                    | Allowed                   | <0.5                  | <=5     | Allowed               | Allowed                    | 2 years          | 54.5                  |          |
| Saccon       | Italy          | 2020                | 646               | NR        | NR    | NR               | NR                 | NR     | Longitudinal                    | 5               | Any                    | Allowed                   | <0.5                  | <=5     | Allowed               | Allowed                    | 3 years          | 38.4                  |          |
| Saccon       | Italy          | 2020                | 646               | NR        | NR    | NR               | NR                 | NR     | Longitudinal                    | 5               | Any                    | Allowed                   | <0.5                  | <=5     | Allowed               | Allowed                    | 4 years          | 25.7                  |          |
| Saccon       | Italy          | 2020                | 646               | NR        | NR    | NR               | NR                 | NR     | Longitudinal                    | 5               | Any                    | Allowed                   | <0.5                  | <=5     | Allowed               | Allowed                    | 5 years          | 12.5                  |          |
| Saccon       | Italy          | 2020                | 646               | NR        | NR    | NR               | NR                 | NR     | Longitudinal                    | 5               | CSLEAI=0               | Allowed                   | <0.5                  | Allowed | Allowed               | Allowed                    | 1 year           | 73.7                  |          |
| Saccon       | Italy          | 2020                | 646               | NR        | NR    | NR               | NR                 | NR     | Longitudinal                    | 5               | CSLEAI=0               | Allowed                   | <0.5                  | Allowed | Allowed               | Allowed                    | 2 years          | 57.1                  |          |
| Saccon       | Italy          | 2020                | 646               | NR        | NR    | NR               | NR                 | NR     | Longitudinal                    | 5               | CSLEAI=0               | Allowed                   | <0.5                  | Allowed | Allowed               | Allowed                    | 3 years          | 39.3                  |          |
| Saccon       | Italy          | 2020                | 646               | NR        | NR    | NR               | NR                 | NR     | Longitudinal                    | 5               | CSLEAI=0               | Allowed                   | <0.5                  | Allowed | Allowed               | Allowed                    | 4 years          | 25.9                  |          |
| Saccon       | Italy          | 2020                | 646               | NR        | NR    | NR               | NR                 | NR     | Longitudinal                    | 5               | CSLEAI=0               | Allowed                   | <0.5                  | Allowed | Allowed               | Allowed                    | 5 years          | 12.7                  |          |
| Saccon       | Italy          | 2020                | 646               | NR        | NR    | NR               | NR                 | NR     | Longitudinal                    | 5               | CSLEAI=0               | Allowed                   | Any                   | <=5     | Allowed               | Allowed                    | 1 year           | 77.2                  |          |
| Saccon       | Italy          | 2020                | 646               | NR        | NR    | NR               | NR                 | NR     | Longitudinal                    | 5               | CSLEAI=0               | Allowed                   | Any                   | <=5     | Allowed               | Allowed                    | 2 years          | 63.2                  |          |
| Saccon       | Italy          | 2020                | 646               | NR        | NR    | NR               | NR                 | NR     | Longitudinal                    | 5               | CSLEAI=0               | Allowed                   | Any                   | <=5     | Allowed               | Allowed                    | 3 years          | 45.5                  |          |
| Saccon       | Italy          | 2020                | 646               | NR        | NR    | NR               | NR                 | NR     | Longitudinal                    | 5               | CSLEAI=0               | Allowed                   | Any                   | <=5     | Allowed               | Allowed                    | 4 years          | 34.1                  |          |
| Saccon       | Italy          | 2020                | 646               | NR        | NR    | NR               | NR                 | NR     | Longitudinal                    | 5               | CSLEAI=0               | Allowed                   | Any                   | <=5     | Allowed               | Allowed                    | 5 years          | 16.6                  |          |
| Saccon       | Italy          | 2020                | 646               | NR        | NR    | NR               | NR                 | NR     | Longitudinal                    | 5               | CSLEAI=0               | Allowed                   | <0.5                  | <=5     | Allowed               | Allowed                    | 1 year           | 69.2                  |          |
| Saccon       | Italy          | 2020                | 646               | NR        | NR    | NR               | NR                 | NR     | Longitudinal                    | 5               | CSLEAI=0               | Allowed                   | <0.5                  | <=5     | Allowed               | Allowed                    | 2 years          | 53.6                  |          |
| Saccon       | Italy          | 2020                | 646               | NR        | NR    | NR               | NR                 | NR     | Longitudinal                    | 5               | CSLEAI=0               | Allowed                   | <0.5                  | <=5     | Allowed               | Allowed                    | 3 years          | 37.6                  |          |
| Saccon       | Italy          | 2020                | 646               | NR        | NR    | NR               | NR                 | NR     | Longitudinal                    | 5               | CSLEAI=0               | Allowed                   | <0.5                  | <=5     | Allowed               | Allowed                    | 4 years          | 24.9                  |          |
| Saccon       | Italy          | 2020                | 646               | NR        | NR    | NR               | NR                 | NR     | Longitudinal                    | 5               | CSLEAI=0               | Allowed                   | <0.5                  | <=5     | Allowed               | Allowed                    | 5 years          | 12.4                  |          |
| Jakez-Ocampo | Mexico         | 2020                | NR (case control) | NR        | NR    | NR               | NR                 | NR     | Cross-sectional                 | NR              | CSLEAI=0               | Allowed                   | NR                    | 0       | Not allowed           | Not allowed                | 10 years         | NR                    |          |
| Nikfar       | Iran           | 2020                | 193               | NR        | NR    | NR               | NR                 | NR     | Longitudinal                    | 8               | CSLEAI=0               | Allowed                   | <0.5                  | <=5     | Not allowed           | Allowed                    | 1 year           | 49.2                  |          |
| Nikfar       | Iran           | 2020                | 193               | NR        | NR    | NR               | NR                 | NR     | Longitudinal                    | 8               | CSLEAI=0               | Allowed                   | <0.5                  | <=5     | Not allowed           | Allowed                    | 5 years          | 24.4                  |          |
| Nikfar       | Iran           | 2020                | 193               | NR        | NR    | NR               | NR                 | NR     | Longitudinal                    | 8               | CSLEAI=0               | Allowed                   | <0.5                  | 0       | Not allowed           | Allowed                    | 1 year           | 38.9                  |          |
| Nikfar       | Iran           | 2020                | 193               | NR        | NR    | NR               | NR                 | NR     | Longitudinal                    | 8               | CSLEAI=0               | Allowed                   | <0.5                  | 0       | Not allowed           | Allowed                    | 5 years          | 35.2                  |          |
| Nikfar       | Iran           | 2020                | 193               | NR        | NR    | NR               | NR                 | NR     | Longitudinal                    | 8               | CSLEAI=0               | Not allowed               | <0.5                  | 0       | Not allowed           | Allowed                    | 1 year           | 19.2                  |          |
| Nikfar       | Iran           | 2020                | 193               | NR        | NR    | NR               | NR                 | NR     | Longitudinal                    | 8               | CSLEAI=0               | Not allowed               | <0.5                  | 0       | Not allowed           | Allowed                    | 5 years          | 13.5                  |          |
| Authors      | Country/Region | Year of publication | Patients          | Ethnicity |       |                  |                    |        | Cross-sectional or longitudinal | Follow-up years | LDA                    |                           |                       |         |                       |                            |                  |                       | % on LDA |
|              |                |                     |                   | Caucasian | Asian | Mestizo/Hispanic | African descendant | Others |                                 |                 | Disease activity index | Exclusion of New activity | Major Organ Exclusion | PGA     | Prednisone daily dose | Immunosuppressive drug use | Antimalarial use | Minimal duration      |          |
| Polachek     | Canada         | 2017                | 620               | NR        | NR    | NR               | NR                 | NR     | Longitudinal                    | 4               | SLEDAI<=2              | No                        | No                    | NR      | Not allowed           | Not allowed                | Allowed          | 1 year                | 43.7     |
| Ugarte-Gil   | Latin America  | 2017                | 1350              | 41.8      |       | 42.7             | 11.7               | 3.8    | Longitudinal                    | 2.4             | SLEDAI<=4              | No                        | No                    | NR      | <=7.5                 | Allowed                    | Allowed          | at least once         | 34.4     |
| Tsang-A-Sjoe | Netherlands    | 2017                | 183               | 68.3      | NR    | NR               | NR                 | 31.7   | Longitudinal                    | 5               | SLEDAI<=4              | No                        | Yes                   | <=2/10  | <=7.5                 | Allowed                    | Allowed          | 1 year                | 56.2     |
| Golder       | Asia Pacific   | 2017                | 1422              | 8         | 90    | NR               | NR                 | 2      | cross-sectional                 | NR              | SLEDAI<=4              | Yes                       | Yes                   | <=1     | <=7.5                 | Allowed                    | Allowed          | NR                    | 42       |
| Tani         | Italy          | 2018                | 115               | NR        | NR    | NR               | NR                 | NR     | Longitudinal                    | at least 5      | SLEDAI<=4              | No                        | Yes                   | <=1     | <=7.5                 | Allowed                    | Allowed          | 100% of the follow-up | 36.5     |
| Tani         | Italy          | 2018                | 115               | NR        | NR    | NR               | NR                 | NR     | Longitudinal                    | at least 5      | SLEDAI<=4              | No                        | Yes                   | <=1     | <=7.5                 | Allowed                    | Allowed          | 50%                   | 70.4     |
| Zen          | Italy          | 2018                | 293               | 100       | 0     | 0                | 0                  | 0      | Longitudinal                    | 7               | SLEDAI<=4              | Yes                       | Yes                   | <=1     | <=7.5                 | Allowed                    | Allowed          | 1 year                | 87.0     |
| Zen          | Italy          | 2018                | 293               | 100       | 0     | 0                | 0                  | 0      | Longitudinal                    | 7               | SLEDAI<=4              | Yes                       | Yes                   | <=1     | <=7.5                 | Allowed                    | Allowed          | 2 year                | 75.8     |
| Zen          | Italy          | 2018                | 293               | 100       | 0     | 0                | 0                  | 0      | Longitudinal                    | 7               | SLEDAI<=4              | Yes                       | Yes                   | <=1     | <=7.5                 | Allowed                    | Allowed          | 3 year                | 61.1     |
| Zen          | Italy          | 2018                | 293               | 100       | 0     | 0                | 0                  | 0      | Longitudinal                    | 7               | SLEDAI<=4              | Yes                       | Yes                   | <=1     | <=7.5                 | Allowed                    | Allowed          | 4 year                | 47.8     |
| Zen          | Italy          | 2018                | 293               | 100       | 0     | 0                | 0                  | 0      | Longitudinal                    | 7               | SLEDAI<=4              | Yes                       | Yes                   | <=1     | <=7.5                 | Allowed                    | Allowed          | 5 year                | 37.2     |
| Petri        | US             | 2018                | 1356              | 55        | NR    | NR               | 38                 | 7      | Longitudinal                    | NR              | SLEDAI<=4              | Yes                       | Yes                   | <=1     | <=7.5                 | Allowed                    | Allowed          | NR                    | NR       |
| Poomsalood   | Thailand       | 2018                | 237               | NR        | NR    | NR               | NR                 | NR     | cross-sectional                 | NR              | C-SLEDAI<=2            | No                        | No                    | NR      | <=7.5                 | Allowed                    | Allowed          | 1 year                | 6.16     |
| Alarcon      | US             | 2019                | 558               | 28        | 0     | 35               | 37                 | 0      | Longitudinal                    | NR              | SLAM<=3                | No                        | No                    | NR      | <=7.5                 | Not allowed                | Allowed          | NR                    | NR       |

|                    |              |      |      |      |      |    |    |     |              |     |                    |     |     |     |       |             |         |                    |                            |
|--------------------|--------------|------|------|------|------|----|----|-----|--------------|-----|--------------------|-----|-----|-----|-------|-------------|---------|--------------------|----------------------------|
| Mathian A          | France       | 2019 | 407  | NR   | NR   | NR | NR | NR  | Longitudinal | 1   | SLEDAI<=4          | Yes | Yes | NR  | <=7.5 | Allowed     | Allowed | NR                 | 12.4 (excluding remission) |
| Golder             | Asia Pacific | 2019 | 1707 | 10.1 | 87.7 | 0  | 0  | 2.2 | longitudinal | 2.2 | SLEDAI<=4          | Yes | Yes | <=1 | <=7.5 | Allowed     | Allowed | 50%                | 47.0                       |
| Golder             | Asia Pacific | 2019 | 1707 | 10.1 | 87.7 | 0  | 0  | 2.2 | longitudinal | 2.2 | SLEDAI<=4          | Yes | Yes | <=1 | <=7.5 | Allowed     | Allowed | At least once      | 78.0                       |
| Golder             | Asia Pacific | 2019 | 1707 | 10.1 | 87.7 | 0  | 0  | 2.2 | longitudinal | 2.2 | SLEDAI<=4          | Yes | Yes | <=1 | <=7.5 | Allowed     | Allowed | at least 12 months | 48.2                       |
| Ugarte-Gil         | USA          | 2019 | 483  | NR   | NR   | NR | NR | NR  | Longitudinal | NR  | SLAM<=3            | No  | No  | NR  | <=7.5 | Not allowed | Allowed | NR                 | NR                         |
| Reatetgui-Sokolova | Peru         | 2019 | 315  | NR   | NR   | NR | NR | NR  | longitudinal | NR  | SLEDAI<=4          | No  | No  | NR  | <=7.5 | Allowed     | Allowed | at least once      | 30,5 at baseline           |
| Ugarte-Gil         | Peru         | 2019 | 208  | NR   | NR   | NR | NR | NR  | longitudinal | 2.2 | SLEDAI<=4          | No  | No  | NR  | <=7.5 | Allowed     | Allowed | at least once      | 61.6% of the visits        |
| Sharma             | Norway       | 2020 | 206  | 100  | 0    | 0  | 0  | 0   | longitudinal | 10  | SLEDAI<=4          | Yes | Yes | NR  | <=7.5 | Allowed     | Allowed | 30%                | 55.3                       |
| Sharma             | Norway       | 2020 | 206  | 100  | 0    | 0  | 0  | 0   | longitudinal | 10  | SLEDAI<=4          | Yes | Yes | NR  | <=7.5 | Allowed     | Allowed | 50%                | 33.5                       |
| Sharma             | Norway       | 2020 | 206  | 100  | 0    | 0  | 0  | 0   | longitudinal | 10  | SLEDAI<=4          | Yes | Yes | NR  | <=7.5 | Allowed     | Allowed | 70%                | 18.4                       |
| Yeo                | Australia    | 2020 | 200  | 52   | 39.5 | NR | NR | 8.5 | longitudinal | 2.1 | SLEDAI<=4          | Yes | Yes | <=1 | <=7.5 | Allowed     | Allowed | 50%                | 51                         |
| Floris             | Italy        | 2020 | 116  | 100% | 0    | 0  | 0  | 0   | Longitudinal | 1.5 | SLEDAI<=4          | Yes | Yes | <=1 | <=7.5 | Allowed     | Allowed | NR                 | 42.2 at 6 months           |
| Floris             | Italy        | 2020 | 116  | 100% | 0    | 0  | 0  | 0   | Longitudinal | 1.5 | SLEDAI<=4          | Yes | Yes | <=1 | <=7.5 | Allowed     | Allowed | NR                 | 46.2 at 18 months          |
| Loothrenoo         | Thailand     | 2020 | 337  | NR   | NR   | NR | NR | NR  | Longitudinal | 3.2 | SLEDAI<=4          | Yes | Yes | <=1 | <=7.5 | Allowed     | Allowed | NR                 | 80.7                       |
| Kang               | Korea        | 2020 | 299  | NR   | NR   | NR | NR | NR  | Longitudinal | 4   | Clinical SLEDAI<=1 | NR  | NR  | NR  | 5     | Allowed     | Allowed | NR                 | 29.1 (year 1)              |
| Kang               | Korea        | 2020 | 299  | NR   | NR   | NR | NR | NR  | Longitudinal | 4   | Clinical SLEDAI<=2 | NR  | NR  | NR  | 0     | Not allowed | allowed | NR                 | 4.0 (year 1)               |
| Kang               | Korea        | 2020 | 299  | NR   | NR   | NR | NR | NR  | Longitudinal | 4   | SLEDAI<=4          | Yes | Yes | <=1 | <=7.5 | Allowed     | Allowed | NR                 | 70.2 (year 1)              |

LDA: Low disease activity. PGA: Physician Global Assessment. NR: Not reported. LDA: Low Disease Activity. \*If an article included more than one definition, a row per definition is included.
